# Supplementary material for: 16S-rRNA-Based Metagenomic Profiling of the Bacterial Communities in Traditional Bulgarian Sourdoughs
Source: MDPI journal article supplement (doi:10.3390/microorganisms11030803), 2023-03-21
Supplement: s1 [file s1]

**Table S2.** The number of bacterial taxonomic units (OTUs) recovered from the studied sourdough samples and alpha diversity indices.

| Sample name | OTUs | Shannon | Simpson | Chao1    | ACE      |
|-------------|------|---------|---------|----------|----------|
| D5          | 1164 | 3.011   | 0.579   | 1157.333 | 1173.459 |
| D8          | 1072 | 3.718   | 0.824   | 1145.333 | 1174.965 |
| D9          | 505  | 2.120   | 0.635   | 450.744  | 477.663  |
| D11         | 672  | 2.367   | 0.547   | 664.303  | 679.753  |
| D12         | 667  | 2.806   | 0.682   | 676.714  | 693.118  |
