# Supplementary material for: 16S-rRNA-Based Metagenomic Profiling of the Bacterial Communities in Traditional Bulgarian Sourdoughs
Source: MDPI journal article supplement (doi:10.3390/microorganisms11030803), 2023-03-21
Supplement: s1 [file s1]

**Table S1.** Statistics of the sample reads raw tags, clean tags, and quality.

| Sample | Raw PE  | Raw Tags | Clean Tags | Effective Tags | Avg Len (nt) | Q30   |
|--------|---------|----------|------------|----------------|--------------|-------|
| D11    | 158,838 | 149,521  | 147,353    | 129,179        | 426          | 94.13 |
| D12    | 154,620 | 138,150  | 135,848    | 117,360        | 423          | 93.92 |
| D5     | 165,023 | 156,804  | 154,247    | 128,215        | 427          | 93.97 |
| D8     | 161,563 | 153,839  | 151,485    | 118,851        | 427          | 93.94 |
| D9     | 166,460 | 157,051  | 153,854    | 130,995        | 429          | 93.58 |
