# Supplementary material for: 16S-rRNA-Based Metagenomic Profiling of the Bacterial Communities in Traditional Bulgarian Sourdoughs
Source: MDPI journal article supplement (doi:10.3390/microorganisms11030803), 2023-03-21
Supplement: s1 [file s1]

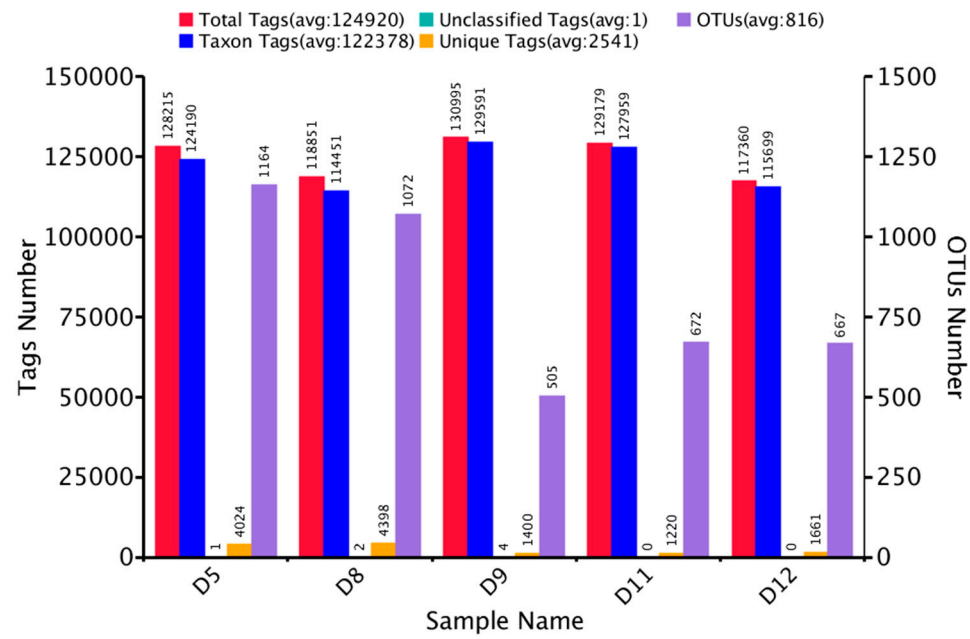

**Figure S1.** Summary of the annotated tags and OTU numbers of each sample.

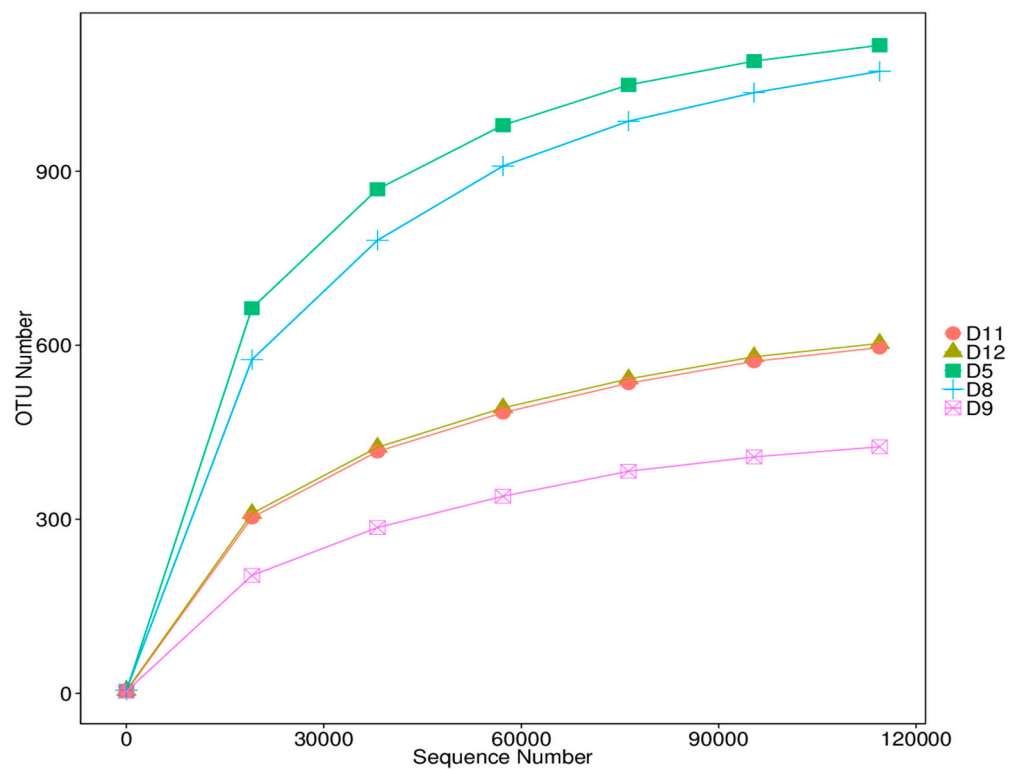

**Figure S2.** Rarefaction curves of sourdough samples and identified OTU numbers.
